# Supplementary material for: Jet-cooled laser-induced fluorescence spectroscopy of methylcyclohexoxy radicals
Source: Royal Society of Chemistry journal article supplement (doi:10.1039/c1ra00216c), 2011-11-14
Supplement: c1ra00216c.pdf [file c1ra00216c.pdf]

Table 1. Calculated 57 vibrational frequencies ( $\text{cm}^{-1}$ ) of the diequatorial chair conformer of *trans*-4-methylcyclohexoxy radical ( $C_s$  symmetry) in its ground state and  $\tilde{B}$  excited state.<sup>a</sup>

| assignment      | symmetry | CASSCF(9,7) <sup>b</sup> | CASSCF(9,7) <sup>b</sup> | B3LYP <sup>c</sup> |
|-----------------|----------|--------------------------|--------------------------|--------------------|
|                 |          | $\tilde{B}$              | $\tilde{X}$              | $\tilde{X}$        |
| v <sub>32</sub> | a'       | 108                      | 109                      | 106                |
| v <sub>57</sub> | a''      | 214                      | 219                      | 211                |
| v <sub>56</sub> | a''      | 240                      | 241                      | 228                |
| v <sub>31</sub> | a'       | 245                      | 250                      | 244                |
| v <sub>55</sub> | a''      | 267                      | 256                      | 252                |
| v <sub>54</sub> | a''      | 331                      | 336                      | 328                |
| v <sub>30</sub> | a'       | 355                      | 377                      | 364                |
| v <sub>29</sub> | a'       | 426                      | 426                      | 411                |
| v <sub>28</sub> | a'       | 456                      | 455                      | 431                |
| v <sub>53</sub> | a''      | 463                      | 465                      | 450                |
| v <sub>27</sub> | a'       | 536                      | 596                      | 579                |
| v <sub>26</sub> | a'       | 694                      | 781                      | 749                |
| v <sub>25</sub> | a'       | 797                      | 814                      | 769                |
| v <sub>52</sub> | a''      | 817                      | 851                      | 795                |
| v <sub>24</sub> | a'       | 884                      | 914                      | 808                |
| v <sub>51</sub> | a''      | 908                      | 951                      | 882                |
| v <sub>50</sub> | a''      | 975                      | 960                      | 933                |
| v <sub>23</sub> | a'       | 989                      | 991                      | 948                |
| v <sub>22</sub> | a'       | 999                      | 1024                     | 951                |
| v <sub>21</sub> | a'       | 1009                     | 1032                     | 1001               |
| v <sub>49</sub> | a''      | 1030                     | 1045                     | 1017               |
| v <sub>48</sub> | a''      | 1097                     | 1094                     | 1039               |
| v <sub>20</sub> | a'       | 1104                     | 1117                     | 1057               |
| v <sub>47</sub> | a''      | 1140                     | 1133                     | 1066               |
| v <sub>19</sub> | a'       | 1164                     | 1200                     | 1112               |
| v <sub>46</sub> | a''      | 1220                     | 1205                     | 1148               |
| v <sub>18</sub> | a'       | 1237                     | 1282                     | 1181               |
| v <sub>45</sub> | a''      | 1264                     | 1286                     | 1198               |
| v <sub>17</sub> | a'       | 1316                     | 1317                     | 1222               |
| v <sub>16</sub> | a'       | 1324                     | 1321                     | 1254               |
| v <sub>44</sub> | a''      | 1371                     | 1351                     | 1272               |
| v <sub>43</sub> | a''      | 1382                     | 1387                     | 1315               |
| v <sub>15</sub> | a'       | 1383                     | 1388                     | 1316               |
| v <sub>14</sub> | a'       | 1414                     | 1419                     | 1322               |
| v <sub>42</sub> | a''      | 1442                     | 1445                     | 1351               |
| v <sub>13</sub> | a'       | 1463                     | 1451                     | 1360               |

Table 1.-continued

| assignment      | symmetry | CASSCF(9,7) <sup>b</sup> | CASSCF(9,7) <sup>b</sup> | B3LYP <sup>c</sup> |
|-----------------|----------|--------------------------|--------------------------|--------------------|
|                 |          | $\tilde{B}$              | $\tilde{X}$              | $\tilde{X}$        |
| v <sub>41</sub> | a''      | 1476                     | 1469                     | 1382               |
| v <sub>12</sub> | a'       | 1484                     | 1482                     | 1405               |
| v <sub>40</sub> | a''      | 1542                     | 1541                     | 1471               |
| v <sub>11</sub> | a'       | 1555                     | 1549                     | 1475               |
| v <sub>39</sub> | a''      | 1556                     | 1554                     | 1482               |
| v <sub>38</sub> | a''      | 1557                     | 1556                     | 1489               |
| v <sub>10</sub> | a'       | 1558                     | 1557                     | 1491               |
| v <sub>9</sub>  | a'       | 1570                     | 1564                     | 1492               |
| v <sub>8</sub>  | a'       | 3010                     | 2997                     | 2777               |
| v <sub>37</sub> | a''      | 3022                     | 3003                     | 2928               |
| v <sub>7</sub>  | a'       | 3029                     | 3009                     | 2943               |
| v <sub>6</sub>  | a'       | 3037                     | 3018                     | 2951               |
| v <sub>36</sub> | a''      | 3074                     | 3031                     | 2970               |
| v <sub>5</sub>  | a'       | 3075                     | 3032                     | 2972               |
| v <sub>4</sub>  | a'       | 3090                     | 3038                     | 2977               |
| v <sub>35</sub> | a''      | 3092                     | 3062                     | 2998               |
| v <sub>34</sub> | a''      | 3096                     | 3066                     | 3002               |
| v <sub>3</sub>  | a'       | 3097                     | 3083                     | 3027               |
| v <sub>2</sub>  | a'       | 3138                     | 3085                     | 3029               |
| v <sub>33</sub> | a''      | 3139                     | 3088                     | 3030               |
| v <sub>1</sub>  | a'       | 3198                     | 3089                     | 3035               |

<sup>a</sup> All calculations employed the 6-31+G(d) basis set. <sup>b</sup> A uniform scale factor of 0.95 was used. <sup>c</sup> The calculated B3LYP frequencies are scaled by 0.98.

Table 2. Calculated 57 vibrational frequencies ( $\text{cm}^{-1}$ ) of the diequatorial chair conformer of *cis*-3-methylcyclohexoxy radical ( $C_1$  symmetry) in its ground state and  $\tilde{B}$  excited state.<sup>a</sup>

| assignment      | CASSCF(9,7) <sup>b</sup> | CASSCF(9,7) <sup>b</sup> | B3LYP <sup>c</sup> |
|-----------------|--------------------------|--------------------------|--------------------|
|                 | $\tilde{B}$              | $\tilde{X}$              | $\tilde{X}$        |
| v <sub>57</sub> | 146                      | 147                      | 144                |
| v <sub>56</sub> | 150                      | 152                      | 146                |
| v <sub>55</sub> | 239                      | 239                      | 228                |
| v <sub>54</sub> | 244                      | 243                      | 234                |
| v <sub>53</sub> | 278                      | 283                      | 279                |
| v <sub>52</sub> | 349                      | 348                      | 339                |
| v <sub>51</sub> | 380                      | 399                      | 383                |
| v <sub>50</sub> | 405                      | 419                      | 408                |
| v <sub>49</sub> | 454                      | 449                      | 431                |
| v <sub>48</sub> | 463                      | 475                      | 457                |
| v <sub>47</sub> | 525                      | 550                      | 535                |
| v <sub>46</sub> | 680                      | 794                      | 756                |
| v <sub>45</sub> | 796                      | 851                      | 775                |
| v <sub>44</sub> | 868                      | 884                      | 820                |
| v <sub>43</sub> | 882                      | 896                      | 854                |
| v <sub>42</sub> | 907                      | 914                      | 861                |
| v <sub>41</sub> | 935                      | 957                      | 914                |
| v <sub>40</sub> | 967                      | 997                      | 933                |
| v <sub>39</sub> | 1001                     | 1003                     | 961                |
| v <sub>38</sub> | 1013                     | 1014                     | 984                |
| v <sub>37</sub> | 1058                     | 1070                     | 1016               |
| v <sub>36</sub> | 1106                     | 1098                     | 1037               |
| v <sub>35</sub> | 1113                     | 1125                     | 1070               |
| v <sub>34</sub> | 1139                     | 1131                     | 1076               |
| v <sub>33</sub> | 1163                     | 1192                     | 1117               |
| v <sub>32</sub> | 1207                     | 1210                     | 1155               |
| v <sub>31</sub> | 1240                     | 1269                     | 1165               |
| v <sub>30</sub> | 1272                     | 1289                     | 1191               |
| v <sub>29</sub> | 1322                     | 1312                     | 1230               |
| v <sub>28</sub> | 1326                     | 1335                     | 1263               |
| v <sub>27</sub> | 1348                     | 1349                     | 1275               |
| v <sub>26</sub> | 1386                     | 1380                     | 1289               |
| v <sub>25</sub> | 1402                     | 1390                     | 1319               |
| v <sub>24</sub> | 1425                     | 1434                     | 1342               |
| v <sub>23</sub> | 1428                     | 1436                     | 1355               |
| v <sub>22</sub> | 1459                     | 1449                     | 1360               |

Table 2.-continued

| assignment      | CASSCF(9,7) <sup>b</sup> | CASSCF(9,7) <sup>b</sup> | B3LYP <sup>c</sup> |
|-----------------|--------------------------|--------------------------|--------------------|
|                 | $\tilde{B}$              | $\tilde{X}$              | $\tilde{X}$        |
| v <sub>21</sub> | 1475                     | 1467                     | 1375               |
| v <sub>20</sub> | 1483                     | 1482                     | 1403               |
| v <sub>19</sub> | 1544                     | 1542                     | 1471               |
| v <sub>18</sub> | 1551                     | 1547                     | 1474               |
| v <sub>17</sub> | 1554                     | 1552                     | 1481               |
| v <sub>16</sub> | 1555                     | 1556                     | 1490               |
| v <sub>15</sub> | 1557                     | 1557                     | 1491               |
| v <sub>14</sub> | 1571                     | 1566                     | 1493               |
| v <sub>13</sub> | 3005                     | 2993                     | 2777               |
| v <sub>12</sub> | 3027                     | 3002                     | 2923               |
| v <sub>11</sub> | 3032                     | 3015                     | 2949               |
| v <sub>10</sub> | 3038                     | 3020                     | 2956               |
| v <sub>9</sub>  | 3071                     | 3027                     | 2966               |
| v <sub>8</sub>  | 3079                     | 3033                     | 2972               |
| v <sub>7</sub>  | 3083                     | 3038                     | 2976               |
| v <sub>6</sub>  | 3094                     | 3060                     | 2999               |
| v <sub>5</sub>  | 3096                     | 3070                     | 3008               |
| v <sub>4</sub>  | 3098                     | 3078                     | 3021               |
| v <sub>3</sub>  | 3133                     | 3086                     | 3029               |
| v <sub>2</sub>  | 3139                     | 3089                     | 3033               |
| v <sub>1</sub>  | 3199                     | 3091                     | 3038               |

<sup>a</sup> All calculations employed the 6-31+G(d) basis set. <sup>b</sup> A uniform scale factor of 0.95 was used. <sup>c</sup> The calculated B3LYP frequencies are scaled by 0.98.

Table 3. Calculated 57 vibrational frequencies ( $\text{cm}^{-1}$ ) of the diequatorial chair conformer of *trans*-2-methylcyclohexoxy radical ( $C_1$  symmetry) in its ground state and  $\tilde{B}$  excited state.<sup>a</sup>

| assignment      | CASSCF(9,7) <sup>b</sup> |             | B3LYP <sup>c</sup> |
|-----------------|--------------------------|-------------|--------------------|
|                 | $\tilde{B}$              | $\tilde{X}$ | $\tilde{X}$        |
| v <sub>57</sub> | 119                      | 122         | 113                |
| v <sub>56</sub> | 180                      | 189         | 178                |
| v <sub>55</sub> | 218                      | 236         | 225                |
| v <sub>54</sub> | 267                      | 263         | 254                |
| v <sub>53</sub> | 323                      | 327         | 313                |
| v <sub>52</sub> | 340                      | 344         | 335                |
| v <sub>51</sub> | 348                      | 356         | 341                |
| v <sub>50</sub> | 399                      | 432         | 416                |
| v <sub>49</sub> | 424                      | 441         | 422                |
| v <sub>48</sub> | 481                      | 479         | 477                |
| v <sub>47</sub> | 549                      | 561         | 543                |
| v <sub>46</sub> | 676                      | 787         | 745                |
| v <sub>45</sub> | 805                      | 849         | 811                |
| v <sub>44</sub> | 844                      | 875         | 820                |
| v <sub>43</sub> | 876                      | 878         | 839                |
| v <sub>42</sub> | 885                      | 935         | 882                |
| v <sub>41</sub> | 936                      | 946         | 918                |
| v <sub>40</sub> | 963                      | 1007        | 932                |
| v <sub>39</sub> | 1007                     | 1013        | 972                |
| v <sub>38</sub> | 1028                     | 1022        | 978                |
| v <sub>37</sub> | 1083                     | 1072        | 1042               |
| v <sub>36</sub> | 1087                     | 1097        | 1059               |
| v <sub>35</sub> | 1110                     | 1110        | 1061               |
| v <sub>34</sub> | 1142                     | 1140        | 1101               |
| v <sub>33</sub> | 1166                     | 1165        | 1115               |
| v <sub>32</sub> | 1202                     | 1206        | 1147               |
| v <sub>31</sub> | 1237                     | 1275        | 1192               |
| v <sub>30</sub> | 1272                     | 1279        | 1238               |
| v <sub>29</sub> | 1310                     | 1319        | 1243               |
| v <sub>28</sub> | 1322                     | 1345        | 1260               |
| v <sub>27</sub> | 1359                     | 1368        | 1298               |
| v <sub>26</sub> | 1389                     | 1387        | 1311               |
| v <sub>25</sub> | 1407                     | 1421        | 1321               |
| v <sub>24</sub> | 1408                     | 1430        | 1346               |
| v <sub>23</sub> | 1433                     | 1447        | 1348               |
| v <sub>22</sub> | 1444                     | 1448        | 1362               |

Table 3.-continued

| assignment      | CASSCF(9,7) <sup>b</sup> |             | B3LYP <sup>c</sup> |
|-----------------|--------------------------|-------------|--------------------|
|                 | $\tilde{B}$              | $\tilde{X}$ | $\tilde{X}$        |
| v <sub>21</sub> | 1480                     | 1461        | 1368               |
| v <sub>20</sub> | 1503                     | 1481        | 1400               |
| v <sub>19</sub> | 1543                     | 1545        | 1472               |
| v <sub>18</sub> | 1549                     | 1549        | 1477               |
| v <sub>17</sub> | 1551                     | 1553        | 1481               |
| v <sub>16</sub> | 1557                     | 1555        | 1488               |
| v <sub>15</sub> | 1564                     | 1560        | 1492               |
| v <sub>14</sub> | 1567                     | 1567        | 1493               |
| v <sub>13</sub> | 3024                     | 3005        | 2859               |
| v <sub>12</sub> | 3030                     | 3012        | 2946               |
| v <sub>11</sub> | 3034                     | 3023        | 2957               |
| v <sub>10</sub> | 3039                     | 3026        | 2962               |
| v <sub>9</sub>  | 3069                     | 3027        | 2967               |
| v <sub>8</sub>  | 3075                     | 3034        | 2973               |
| v <sub>7</sub>  | 3079                     | 3047        | 2995               |
| v <sub>6</sub>  | 3081                     | 3063        | 2999               |
| v <sub>5</sub>  | 3093                     | 3067        | 3007               |
| v <sub>4</sub>  | 3098                     | 3074        | 3013               |
| v <sub>3</sub>  | 3139                     | 3086        | 3032               |
| v <sub>2</sub>  | 3150                     | 3095        | 3051               |
| v <sub>1</sub>  | 3187                     | 3104        | 3053               |

<sup>a</sup> All calculations employed the 6-31+G(d) basis set. <sup>b</sup> A uniform scale factor of 0.95 was used. <sup>c</sup> The calculated B3LYP frequencies are scaled by 0.98.
